# Supplementary material
Source: PubMed Central journal article supplement (PMC3929969)
Supplement: NIHMS547647-supplement-supplement_1.pdf [file NIHMS547647-supplement-supplement_1.pdf]

## **Supplementary Appendix**

Supplement to: Tammemägi MC, Katki HA, Hocking WG, et al. *Selection Criteria for Lung-Cancer Screening*

### **Contents**

Supplementary Figure S1 and S2 page 2

Supplementary Tables S1 to S3 page 4

**Figure S1.** Receiver operator characteristic curve for PLCO<sub>M2012</sub> in the external validation data (PLCO intervention arm)

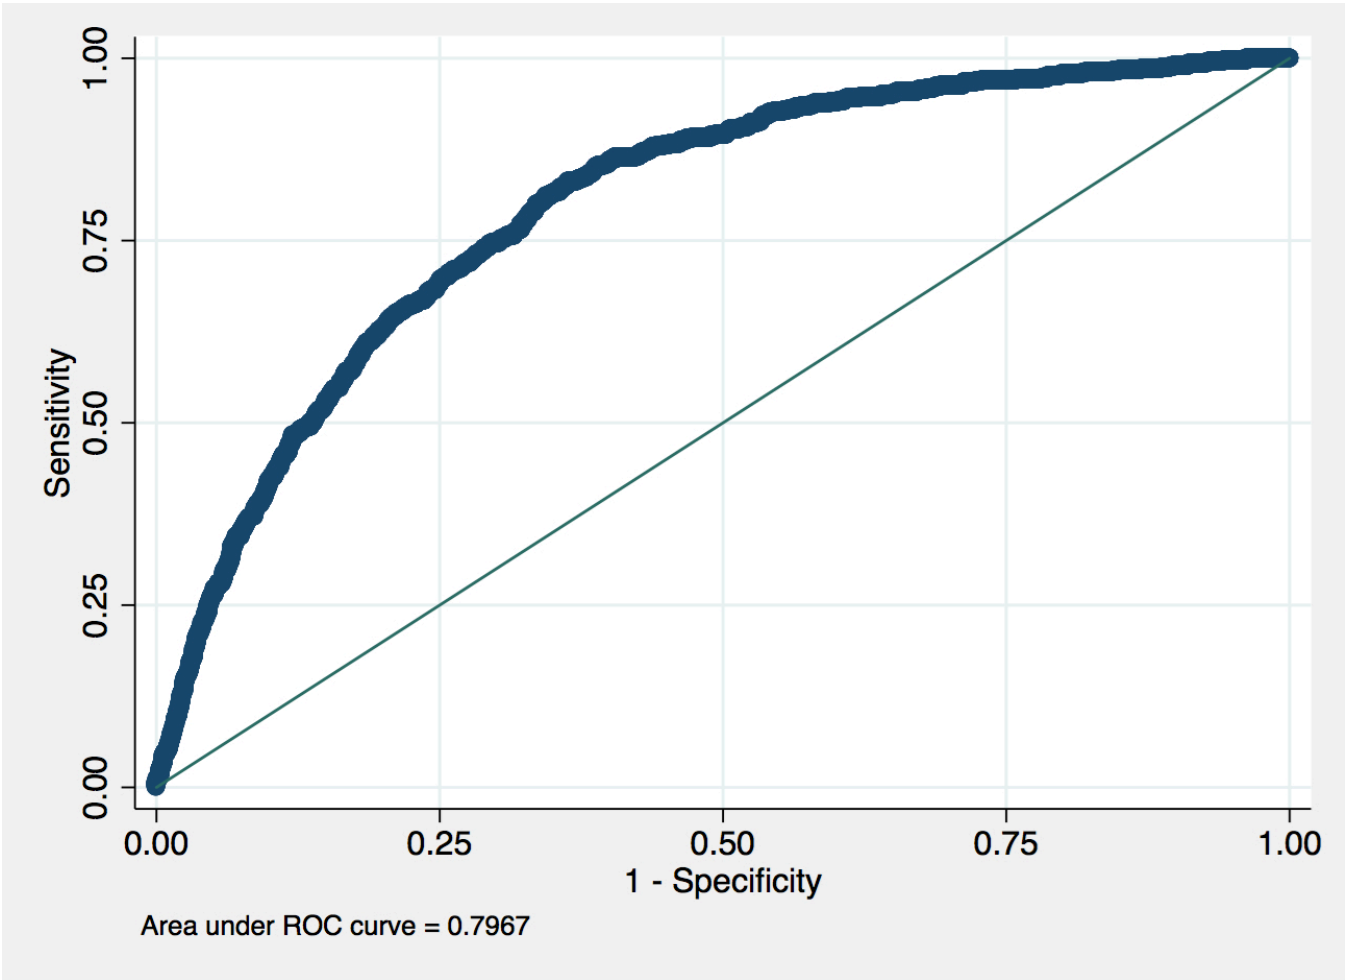

**Abbreviations:** PLCO<sub>M2012</sub>, Prostate, Lung, Colorectal and Ovarian Cancer Screening Trial updated 2012 Model; ROC, receiver operator characteristic.

**Figure S2.** PLCO<sub>M2012</sub> calibration – The mean absolute difference between observed and predicted lung cancer probabilities by model risk deciles

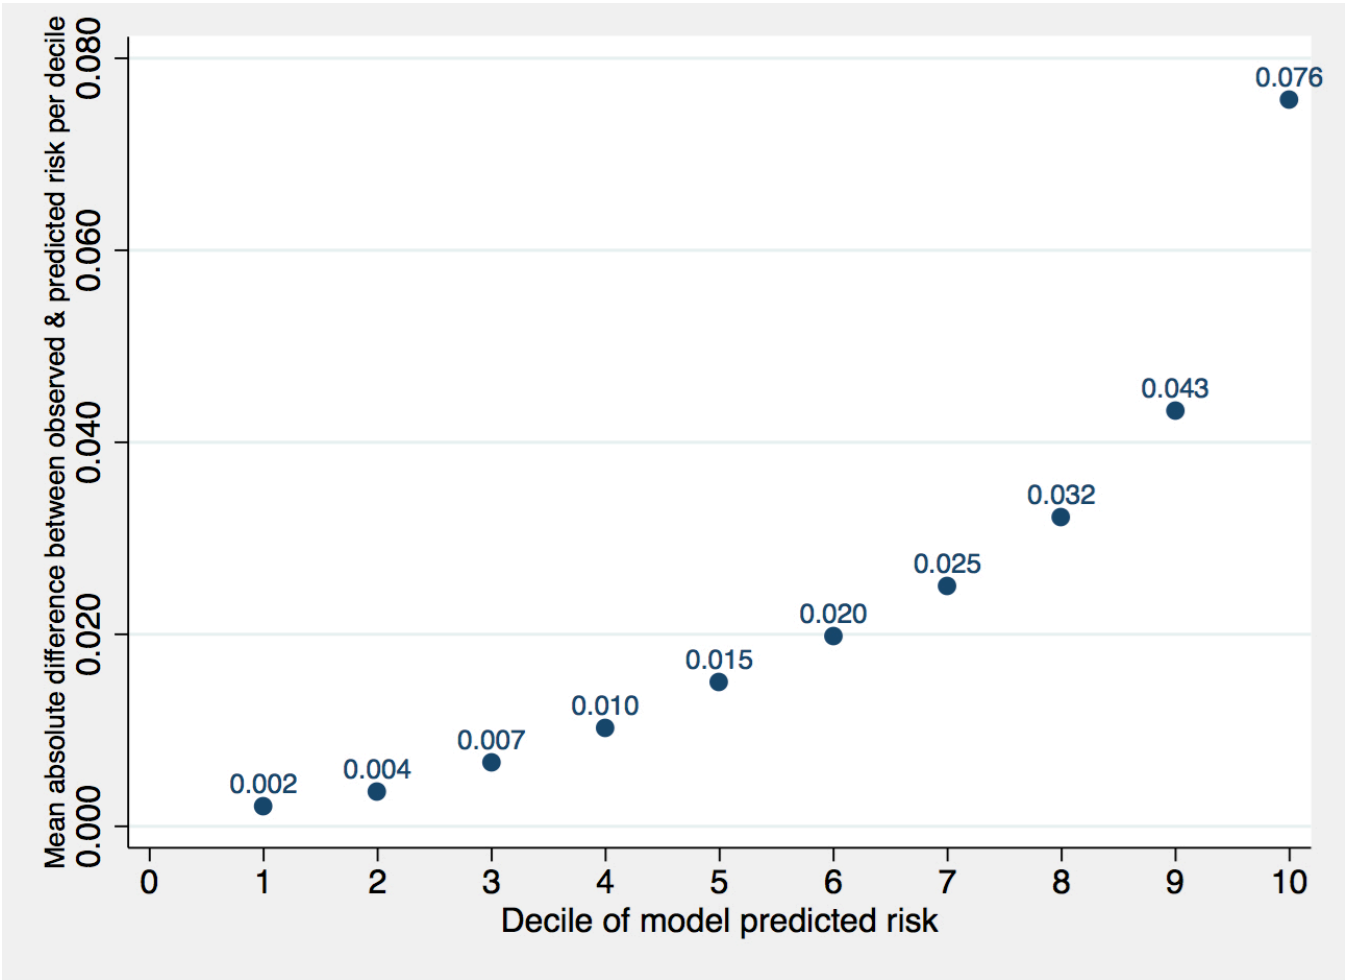

**Table S1.** Distribution of predictor variables in smokers in the PLCO control and intervention (CXR) arms, in the NLST (CXR & LDCT arms pooled) and in the PLCO intervention arm participants who met the NLST smoking criteria for study entry\*, by lung cancer status†‡

| Variables                                                            | PLCO controls*                          |                                  |                               | PLCO CXR arm                            |                                  |                               | NLST (LDCT & CXR arms)                  |                                    |                               | PLCO CXR arm NLST criteria +ve)         |                                  |                               |
|----------------------------------------------------------------------|-----------------------------------------|----------------------------------|-------------------------------|-----------------------------------------|----------------------------------|-------------------------------|-----------------------------------------|------------------------------------|-------------------------------|-----------------------------------------|----------------------------------|-------------------------------|
|                                                                      | No lung cancer<br>N = 39,219<br>(98.2%) | Lung cancer<br>N = 709<br>(1.8%) | Total<br>N = 39,928<br>(100%) | No lung cancer<br>N = 39,694<br>(98.1%) | Lung cancer<br>N = 753<br>(1.9%) | Total<br>N = 40,447<br>(100%) | No lung cancer<br>N = 51,286<br>(96.4%) | Lung cancer<br>N = 1,916<br>(3.6%) | Total<br>N = 53,202<br>(100%) | No lung cancer<br>N = 14,570<br>(96.5%) | Lung cancer<br>N = 529<br>(3.5%) | Total<br>N = 15,099<br>(100%) |
| Age (years)                                                          | 62.4 {5.3}                              | 64.6 {5.2}                       | 62.5 {5.3}<br>p < 0.0001      | 62.3 {5.3}                              | 64.7 {5.2}                       | 62.4 {5.3}<br>p < 0.0001      | 61.3 {5.0}                              | 63.7 {5.3}                         | 61.4 {5.0}<br>p < 0.0001      | 61.8 {5.1}                              | 64.1 {5.1}                       | 61.9 {5.1}<br>p < 0.0001      |
| Sex                                                                  |                                         |                                  |                               |                                         |                                  |                               |                                         |                                    |                               |                                         |                                  |                               |
| Female                                                               | 16545 (98.4%)                           | 271 (1.6%)                       |                               | 16544 (98.3%)                           | 279 (1.7%)                       |                               | 21037 (96.5%)                           | 774 (3.5%)                         |                               | 5712 (96.9%)                            | 182 (3.1%)                       |                               |
| Male                                                                 | 22674 (98.1%)                           | 438 (1.9%)                       | p = 0.035                     | 23150 (98.0%)                           | 474 (2.0%)                       | p = 0.01                      | 30249 (96.4%)                           | 1142 (3.6%)                        | p = 0.60                      | 8858 (96.2%)                            | 347 (3.8%)                       | p = 0.03                      |
| Race/ethnicity                                                       |                                         |                                  |                               |                                         |                                  |                               |                                         |                                    |                               |                                         |                                  |                               |
| White                                                                | 34678 (98.2%)                           | 630 (1.8%)                       |                               | 35066 (98.2%)                           | 664 (1.8%)                       |                               | 46125 (96.4%)                           | 1739 (3.6%)                        |                               | 13133 (96.6%)                           | 457 (3.4%)                       |                               |
| Black                                                                | 2181 (97.6%)                            | 53 (2.4%)                        |                               | 2237 (96.8%)                            | 73 (3.2%)                        |                               | 2233 (95.8%)                            | 98 (4.2%)                          |                               | 734 (93.6%)                             | 50 (6.4%)                        |                               |
| Hispanic                                                             | 806 (99.0%)                             | 8 (1.0%)                         |                               | 799 (98.5%)                             | 12 (1.5%)                        |                               | 650 (98.3%)                             | 11 (1.7%)                          |                               | 231 (97.1%)                             | 7 (2.9%)                         |                               |
| Asian                                                                | 1185 (98.9%)                            | 13 (1.1%)                        |                               | 1223 (98.8%)                            | 15 (1.2%)                        |                               | 1063 (97.1%)                            | 32 (2.9%)                          |                               | 339 (97.1%)                             | 10 (2.9%)                        |                               |
| Native American                                                      | 241 (99.6%)                             | 1 (0.4%)                         |                               | 218 (96.5%)                             | (3.5%)                           |                               | 180 (95.2%)                             | 9 (4.8%)                           |                               | 75 (94.9%)                              | 4 (5.1%)                         |                               |
| Pacific Islander                                                     | 104 (96.3%)                             | 4 (3.7%)                         | p = 0.01                      | 127 (99.2%)                             | 1 (0.8%)                         | p < 0.001                     | 188 (97.5%)                             | 5 (2.6%)                           | p = 0.01                      | 57 (98.3%)                              | 1 (1.7%)                         | p = 0.003                     |
| Education                                                            |                                         |                                  |                               |                                         |                                  |                               |                                         |                                    |                               |                                         |                                  |                               |
|                                                                      | 3394 (97.3%)                            | 96 (2.7%)                        |                               | 3410 (96.5%)                            | 123 (3.5%)                       |                               | 3062 (94.7%)                            | 172 (5.3%)                         |                               | 1448 (94.7%)                            | 81 (5.3%)                        |                               |
|                                                                      | 8619 (97.8%)                            | 197 (2.2%)                       |                               | 8751 (97.8%)                            | 199 (2.2%)                       |                               | 12146 (95.7%)                           | 545 (4.3%)                         |                               | 3531 (96.0%)                            | 147 (4.0%)                       |                               |
|                                                                      | 5380 (98.2%)                            | 98 (1.8%)                        |                               | 5317 (98.3%)                            | 92 (1.7%)                        |                               | 7140 (96.2%)                            | 285 (3.8%)                         |                               | 2078 (97.1%)                            | 61 (2.9%)                        |                               |
|                                                                      | 9111 (98.3%)                            | 161 (1.7%)                       |                               | 9232 (98.2%)                            | 165 (1.8%)                       |                               | 11837 (96.5%)                           | 427 (3.5%)                         |                               | 3610 (96.7%)                            | 123 (3.3%)                       |                               |
|                                                                      | 6363 (98.5%)                            | 94 (1.5%)                        |                               | 6603 (98.5%)                            | 97 (1.5%)                        |                               | 8689 (97.2%)                            | 247 (2.8%)                         |                               | 2093 (96.6%)                            | 74 (3.4%)                        |                               |
|                                                                      | 6197 (99.1%)                            | 59 (0.9%)                        | p < 0.001                     | 6309 (98.8%)                            | 76 (1.2%)                        | p < 0.001                     | 7391 (97.3%)                            | 203 (2.7%)                         | p < 0.001                     | 1792 (97.7%)                            | 42 (2.3%)                        | p < 0.001                     |
| Body mass index (kg/m <sup>2</sup> )                                 | 27.4 {4.8}                              | 26.5 {4.5}                       | 27.4 {4.8}<br>p < 0.0001      | 27.5 {4.9}                              | 26.5 {4.3}                       | 27.4 {4.9}<br>p < 0.0001      | 28.0 {5.1}                              | 26.9 {4.7}                         | 28.0 {5.1}<br>p < 0.0001      | 27.5 {5.0}                              | 26.3 {4.3}                       | 27.5 {4.9}<br>p < 0.0001      |
| Personal history of cancer                                           |                                         |                                  |                               |                                         |                                  |                               |                                         |                                    |                               |                                         |                                  |                               |
| No                                                                   | 37385 (98.3%)                           | 653 (1.7%)                       | p < 0.001                     | 37887 (98.2%)                           | 708 (1.8%)                       | p = 0.06                      | 49105 (96.5%)                           | 1790 (3.5%)                        |                               | 13890 (96.5%)                           | 502 (3.5%)                       | p = 0.60                      |
| Yes                                                                  | 1818 (97.0%)                            | 56 (3.0%)                        |                               | 1797 (97.6%)                            | 45 (2.4%)                        |                               | 2181 (94.5%)                            | 126 (5.5%)                         | p < 0.001                     | 678 (96.2%)                             | 27 (3.8%)                        |                               |
| Family history of LCA                                                |                                         |                                  |                               |                                         |                                  |                               |                                         |                                    |                               |                                         |                                  |                               |
| No                                                                   | 33365 (98.4%)                           | 541 (1.6%)                       | p < 0.001                     | 33569 (98.3%)                           | 564 (1.7%)                       | p < 0.001                     | 39494 (96.6%)                           | 1386 (3.4%)                        | p < 0.001                     | 12127 (96.9%)                           | 393 (3.1%)                       | p < 0.001                     |
| Yes                                                                  | 4393 (97.1%)                            | 130 (2.9%)                       |                               | 4505 (97.1%)                            | 139 (3.0%)                       |                               | 11111 (95.7%)                           | 497 (4.3%)                         |                               | 1763 (94.7%)                            | 99 (5.3%)                        |                               |
| COPD                                                                 |                                         |                                  |                               |                                         |                                  |                               |                                         |                                    |                               |                                         |                                  |                               |
| No                                                                   | 35388 (98.5%)                           | 556 (1.5%)                       |                               | 36035 (98.4%)                           | 596 (1.6%)                       |                               | 48770 (96.6%)                           | 1724 (3.4%)                        |                               | 12452 (96.9%)                           | 402 (3.1%)                       |                               |
| Yes                                                                  | 3451 (96.1%)                            | 142 (3.9%)                       | p < 0.001                     | 3442 (95.8%)                            | 152 (4.2%)                       | p < 0.001                     | 2497 (92.9%)                            | 192 (7.1%)                         | p < 0.001                     | 2051 (94.3%)                            | 124 (5.7%)                       | p < 0.001                     |
| Smoking status                                                       |                                         |                                  |                               |                                         |                                  |                               |                                         |                                    |                               |                                         |                                  |                               |
| Former                                                               | 31600 (98.8%)                           | 385 (1.2%)                       |                               | 31971 (98.7%)                           | 422 (1.3%)                       |                               | 26826 (97.2%)                           | 764 (2.8%)                         |                               | 8740 (97.2%)                            | 250 (2.8%)                       |                               |
| Current                                                              | 7600 (95.9%)                            | 324 (4.1%)                       | p < 0.001                     | 7695 (95.9%)                            | 331 (4.1%)                       | p < 0.001                     | 24460 (95.5%)                           | 1152 (4.5%)                        | p < 0.001                     | 5830 (95.4%)                            | 279 (4.6%)                       | p < 0.001                     |
| Smoking intensity (cig/day)                                          | 24.8 {14.7}                             | 30.2 {15.2}                      | 24.9 {14.7}<br>p < 0.0001     | 24.5 {14.4}                             | 29.6 {15.4}                      | 24.6 {14.5}<br>p < 0.0001     | 28.4 {11.5}                             | 29.6 {11.7}                        | 28.4 {11.5}<br>p < 0.0001     | 30.7 {13.4}                             | 31.5 {14.0}                      | 30.7 {13.6}<br>p = 0.15       |
| Smoking duration (years)                                             | 27.5 {13.8}                             | 39.9 {10.5}                      | 27.7 {13.8}<br>p < 0.0001     | 27.3 {13.8}                             | 40.1 {10.8}                      | 27.6 {13.9}<br>p < 0.0001     | 39.7 {7.3}                              | 44.2 {7.0}                         | 39.8 {7.3}<br>p < 0.0001      | 39.5 {7.2}                              | 44.1 {6.7}                       | 39.7 {7.2}<br>p < 0.0001      |
| Smoking quit time in former smokers (years)                          | 20.3 {12.1}                             | 12.4 {10.5}                      | 20.2 {12.1}<br>p < 0.0001     | 20.4 {12.0}                             | 12.7 {10.7}                      | 20.3 {12.0}<br>p < 0.0001     | 7.3 {4.8}                               | 6.6 {4.8}                          | 7.3 {4.8}<br>p < 0.0001       | 7.6 {4.5}                               | 6.2 {4.6}                        | 7.5 {4.5}<br>p < 0.0001       |
| <b>Predictive Performance</b>                                        |                                         |                                  |                               |                                         |                                  |                               |                                         |                                    |                               |                                         |                                  |                               |
| Lung cancer incidence per 10,000 per year in former, current smokers |                                         |                                  | 20.7, 72.4                    |                                         |                                  | 22.5, 73.3                    |                                         |                                    | 48.0, 79.9                    |                                         |                                  | 48.8, 81.5                    |
| Mean lung cancer probability                                         | 0.0169                                  | 0.0453                           | 0.0174<br>p < 0.0001          | 0.0167                                  | 0.0447                           | 0.0172<br>p < 0.0001          | 0.0316                                  | 0.0519                             | 0.0323<br>p < 0.0001          | 0.0333                                  | 0.0553                           | 0.0340<br>p < 0.0001          |
| AUC (95% CI)§                                                        | 0.803 (0.788 to 0.817)                  |                                  |                               | 0.797 (0.782 to 0.813)                  |                                  |                               | 0.701 (0.689 to 0.712)                  |                                    |                               | 0.710 (0.689 to 0.732)                  |                                  |                               |

**Table S1.** Continued.

**Abbreviations:** AUC, receiver operator characteristic area under the curve, COPD, chronic obstructive pulmonary disease; CXR, chest x-ray; LDCT, low-dose computed tomography; NLST, National Lung Screening Trial; PLCO, Prostate, Lung, Colorectal and Ovarian Cancer Screening Trial, +ve, positive.

\* NLST smoking criteria for study entry included 30 or more pack-years smoked and less than 15 years quit-time in former smokers.

† Lung cancer detected in 6 years of follow-up from randomization.

‡ For categorical variables, row percentages are presented in parentheses. For continuous variables, standard deviations are presented in pointed brackets. Reported p-values are for Fisher's exact test for dichotomous or unordered categorical variables, t-test for continuous variables, and nonparametric test of trend for ordinal data.

§ The 95% confidence intervals are bootstrap bias corrected with bootstrapping using 1000 re-samplings.

**Table S2.** Net Reclassification Improvement analysis of alternative models in the PLCO control ever-smokers

**eTable 1a. Classification of PLCO ever-smoker controls by alternative models - Full model with smoking intensity as non-linear versus linear**

| PLCO control cases                                                 |                                                 |                        |          |        |
|--------------------------------------------------------------------|-------------------------------------------------|------------------------|----------|--------|
|                                                                    | <i>Full model with linear smoking intensity</i> |                        |          |        |
| <i>Full model with nonlinear smoking intensity</i>                 | Low <1%                                         | Intermediate ≥1 to <2% | High ≥2% | Totals |
| Low risk* <1%                                                      | 54                                              | 17                     | 0        | 71     |
| Intermediate risk ≥1 to <2%                                        | 15                                              | 72                     | 12       | 99     |
| High risk ≥2%                                                      | 0                                               | 23                     | 437      | 460    |
| Totals                                                             | 69                                              | 112                    | 449      | 630    |
| Net Reclassification Improvement in cases = 1.4%                   |                                                 |                        |          |        |
| PLCO non-cases                                                     |                                                 |                        |          |        |
|                                                                    | <i>Full model with linear smoking intensity</i> |                        |          |        |
| <i>Full model with nonlinear smoking intensity</i>                 | Low <1%                                         | Intermediate ≥1 to <2% | High ≥2% | Totals |
| Low risk <1%                                                       | 17753                                           | 1344                   | 127      | 19224  |
| Intermediate risk ≥1 to <2%                                        | 1020                                            | 5118                   | 966      | 7104   |
| High risk ≥2%                                                      | 0                                               | 919                    | 8639     | 9558   |
| Totals                                                             | 18773                                           | 7381                   | 9732     | 35886  |
| Net Reclassification Improvement in non-cases = 1.4%               |                                                 |                        |          |        |
| <b>Net Reclassification Improvement overall = 2.1% (p = 0.016)</b> |                                                 |                        |          |        |

**eTable 1b. Classification of PLCO ever-smoker controls by alternative models – Full model versus model without personal history of cancer and race/ethnicity**

| PLCO control cases                                                   |                                                                         |                        |          |        |
|----------------------------------------------------------------------|-------------------------------------------------------------------------|------------------------|----------|--------|
|                                                                      | <i>Full model without personal history of cancer and race/ethnicity</i> |                        |          |        |
| <i>Full model with personal history of cancer and race/ethnicity</i> | Low <1%                                                                 | Intermediate ≥1 to <2% | High ≥2% | Totals |
| Low risk* <1%                                                        | 64                                                                      | 7                      | 0        | 71     |
| Intermediate risk ≥1 to <2%                                          | 4                                                                       | 85                     | 10       | 99     |
| High risk ≥2%                                                        | 0                                                                       | 13                     | 447      | 460    |
| Totals                                                               | 68                                                                      | 105                    | 457      | 630    |
| Net Reclassification Improvement in cases = 0%                       |                                                                         |                        |          |        |
| PLCO non-cases                                                       |                                                                         |                        |          |        |
|                                                                      | <i>Full model without personal history of cancer and race/ethnicity</i> |                        |          |        |
| <i>Full model with personal history of cancer and race/ethnicity</i> | Low <1%                                                                 | Intermediate ≥1 to <2% | High ≥2% | Totals |
| Low risk <1%                                                         | 18622                                                                   | 591                    | 11       | 19224  |
| Intermediate risk ≥1 to <2%                                          | 375                                                                     | 6213                   | 516      | 7104   |
| High risk ≥2%                                                        | 11                                                                      | 399                    | 9148     | 9558   |
| Totals                                                               | 19008                                                                   | 7203                   | 9675     | 35886  |
| Net Reclassification Improvement in non-cases = 0.9%                 |                                                                         |                        |          |        |
| <b>Net Reclassification Improvement overall = 0.9% (p = 0.16)</b>    |                                                                         |                        |          |        |

*Abbreviation:* PLCO, Prostate, Lung, Colorectal and Ovarian Cancer Screening Trial.

\* Risk is the probability of developing lung cancer from study entry to end of six years of follow-up.

**Table S3.** Beta coefficients for comparable Cox and logistic regression model parameters developed in PLCO control ever-smokers (N = 36,286)

| Variables                                                 | Cox model beta coefficients | Logistic model beta coefficient (Table 3 in text) |
|-----------------------------------------------------------|-----------------------------|---------------------------------------------------|
| Age* (per one year)                                       | .0792005                    | .0778868                                          |
| Race/ethnicity                                            |                             |                                                   |
| White                                                     | Referent group              | Referent group                                    |
| Black                                                     | .4224289                    | .3944778                                          |
| Hispanic                                                  | -.7186485                   | -.7434744                                         |
| Asian                                                     | -.4673233                   | -.466585                                          |
| American Indian or Alaskan Native                         | -.33.97007                  | 0                                                 |
| Native Hawaiian or Pacific Islander                       | .9443303                    | 1.027152                                          |
| Education* (per 7 levels)                                 | -.0797203                   | -.0812744                                         |
| Body mass index* (weight in kg/height in m <sup>2</sup> ) | -.0277547                   | -.0274194                                         |
| Chronic obstructive pulmonary disease (yes vs. no)        | .3849946                    | .3553063                                          |
| Personal history of cancer (yes vs. no)                   | .4408969                    | .4589971                                          |
| Family history of lung cancer (yes vs. no)                | .5669498                    | .587185                                           |
| Smoking status (current vs. former)                       | .2499022                    | .2597431                                          |
| Smoking intensity <sup>†</sup> (average cigarettes/day)   | -1.808796 <sup>†</sup>      | -1.822606 <sup>†</sup>                            |
| Smoking duration* (per year)                              | .0317864                    | .0317321                                          |
| Smoking quit time* (per year)                             | -.0306086                   | -.0308572                                         |
| Model constant                                            | NA                          | -4.532506                                         |

**Abbreviations:** CI, confidence interval; kg, kilograms; m, meter; NLST, National Lung Screening Trial, PLCO, Prostate, Lung, Colorectal and Ovarian Cancer Screening Trial.

\* Age is centered on 62 years, education is centered on level 4, body mass index is centered on 27, smoking duration was centered on 27 years, and smoking quit time was centered on 10 years.

<sup>†</sup> Smoking intensity (average number of cigarettes smoked per day) had a nonlinear association with lung cancer and this variable was transformed. For this reason, the odds ratio is not directly interpretable in a meaningful fashion. The variable *smoking intensity* was first scaled by dividing by 10, this term was then exponentiated by the power -1, and this term was then centered by subtracting 0.4021657707 in the Cox model and by subtracting 0.4021541613 in the logistic regression model.
